# Supplementary material
Source: publisher figshare collection journal article supplement (https://gsajournals.figshare.com/ndownloader/files/28102743)
Supplement: Supplementary file 1 [file 28102743]

## Sheet: Table S6
Table S6. Multi-locus mixed-model results from an analysis of fresh kernel elemental phenotypes for chromosomes 2, 7, 9, and 10.
Location	Trait	SNP added to model	Covariate	P-value	RefGen_v4 chromosome	RefGen_v4 position	extBIC	R2LR from model without SNP	R2LR from model with SNP
Both	Cadmium	S2_157751802	Endosperm type	1.53e-23	2	162398589	1596.32	0.14	0.32
NY	Cadmium	S2_157751802	-	2.64e-19	2	162398589	3514.05	0.1	0.26
WI	Cadmium	S2_159765450	Endosperm type	1.98e-15	2	164415588	1555.14	0.09	0.23
WI	Calcium	S10_124069084	-	6.09e-08	10	125112781	-1857.57	0.04	0.12
NY	Nickel	S9_2213924	-	2.8e-08	9	1934330	1048.49	0.08	0.16
Both	Zinc	S7_174515604	-	3.19e-10	7	180076727	-868.58	0.2	0.27
NY	Zinc	S7_174515604	-	4.89e-08	7	180076727	-2799.75	0.12	0.18
WI	Zinc	S7_174515604	-	7.75e-08	7	180076727	1519.7	0.16	0.22
